# Supplementary material
Source: HighWire-hosted journal article supplement (https://jitc.bmj.com/content/8/2/e001437)
Supplement: inline-supplementary-material-11 [file inline-supplementary-material-11.csv]

	SYMBOL	ENTREZID
1	TRIM7	81786
2	LY6G6D	58530
3	GNG4	2786
4	DDX27	55661
5	TNNC2	7125
6	C20orf165	NA
7	PLAGL2	5326
8	POFUT1	23509
9	MLH1	4292
10	NUBPL	80224
11	CTTNBP2	83992
12	CAB39L	81617
13	R3HDML	140902
14	CCDC109B	NA
15	GAS2L1	10634
16	CDC42EP1	11135
17	ASPHD2	57168
18	LCN12	286256
19	EPM2AIP1	9852
20	ENPP3	5169
21	RNF160	NA
22	RAB27B	5874
23	PRR15	222171
24	GRM8	2918
25	KLHL31	401265
26	ZSWIM3	140831
27	C8orf77	NA
28	FER1L4	80307
29	LRRC36	55282
30	CELP	1057
31	ENGASE	64772
32	PPP1R3D	5509
33	SEMA5A	9037
34	C13orf18	NA
35	KIAA1841	84542
36	DUSP4	1846
37	SYN3	8224
38	MAPRE3	22924
39	JAK2	3717
40	FLJ32063	NA
41	MOCOS	55034
42	LOC440944	NA
43	DRD2	1813
44	SLC38A4	55089
45	AKNAD1	254268
46	TCF7	6932
47	FREM2	341640
48	SLC22A11	55867
49	TYMS	7298
50	NAALADL2	254827
51	NEK3	4752
52	RTN4R	65078
53	GABRE	2564
54	EPDR1	54749
55	AXIN2	8313
56	QPRT	23475
57	C20orf112	NA
58	TFAP2A	7020
59	CLCN2	1181
60	USP18	11274
61	AMACR	23600
62	ZNF470	388566
63	POU5F1B	5462
64	SNHG11	128439
65	TRPV6	55503
66	ALOXE3	59344
67	PRDM8	56978
68	GFI1	2672
69	LYPD5	284348
70	CEL	1056
71	HPSE	10855
72	HMSD	284293
73	ANKRD26	22852
74	TINAG	27283
75	AGR2	10551
76	NEURL2	140825
77	C7orf31	136895
78	CTSL2	NA
79	C19orf51	NA
80	GNLY	10578
81	HSPH1	10808
82	MT2A	4502
83	LY6G6E	79136
84	C11orf9	NA
85	PABPC1L	80336
86	SESN1	27244
87	SGMS2	166929
88	LMO4	8543
89	SLC39A5	283375
90	TGFBR2	7048
91	SLC6A4	6532
92	CACNG4	27092
93	DAPK2	23604
94	GPR143	4935
95	SATB2	23314
96	ELF5	2001
97	KHDRBS3	10656
98	ULBP2	80328
99	HSD11B1L	374875
100	TNNT1	7138
101	SHROOM4	57477
102	C18orf18	NA
103	AIFM3	150209
104	SPIRE2	84501
105	SLC30A2	7780
106	RNF125	54941
107	ETV5	2119
108	RAC3	5881
109	PLLP	51090
110	DOCK5	80005
111	GPR126	NA
112	L3MBTL	NA
113	RPL22L1	200916
114	CXCL16	58191
115	SNAI3	333929
116	SECTM1	6398
117	LOC339290	NA
118	KIR2DL4	3805
119	ANO9	338440
120	RPS6KA6	27330
121	ARMC2	84071
122	NEUROG2	63973
123	CHRFAM7A	89832
124	ARNTL2	56938
125	F7	2155
126	C6orf154	NA
127	LAPTM4B	55353
128	SMAP1	60682
129	KCNK1	3775
130	ZBTB10	65986
131	GSPT2	23708
132	TSPAN6	7105
133	OXCT1	5019
134	NKX3-1	4824
135	CYP2B6	1555
136	HUNK	30811
137	CAPS	828
138	SDR16C5	195814
139	PRSS23	11098
140	DDAH2	23564
141	SLC39A2	29986
142	KIAA1984	NA
143	RAB32	10981
144	ZMYND15	84225
145	RAMP1	10267
146	RNF43	54894
147	REG4	83998
148	PLCB4	5332
149	GGT7	2686
150	SGK2	10110
151	ATP9A	10079
152	SPIN3	169981
153	MUC12	10071
154	VAV3	10451
155	KRT23	25984
156	GBP4	115361
157	TDGF3	NA
158	ZNF683	257101
159	SLC35D3	340146
160	BEGAIN	57596
161	CREB3L1	90993
162	GRID2IP	392862
163	FAM114A1	92689
164	KLRC1	3821
165	CHN2	1124
166	RDH12	145226
167	LOC100190938	NA
168	CHRNA7	1139
169	AMT	275
170	C10orf99	387695
171	AQP3	360
172	UMODL1	89766
173	ERP27	121506
174	PKLR	5313
175	ADAM32	203102
176	TDGF1	6997
177	TRPM6	140803
178	RNLS	55328
179	NKD1	85407
180	ACE2	59272
181	SLC25A27	9481
182	MEX3A	92312
183	PLA2G4A	5321
184	PLK2	10769
185	PTPRD	5789
186	C10orf82	143379
187	CCDC68	80323
188	FARP1	10160
189	LYG1	129530
190	DNM3	26052
191	LRRC2	79442
192	SYT7	9066
193	MAP3K6	9064
194	HOXC6	3223
195	KCTD1	284252
196	TMEM176A	55365
197	CEBPA	1050
198	CIITA	4261
199	PAH	5053
200	C9orf71	NA
201	PHACTR3	116154
202	LOC375190	NA
203	PLA2G12B	84647
204	FABP1	2168
205	DMD	1756
206	WNT11	7481
207	TMEM150C	441027
208	WDR35	57539
209	PPP1R14D	54866
210	A1CF	29974
211	H2AFJ	55766
212	RIMBP3	85376
213	NPHP1	4867
214	PIWIL4	143689
215	IHH	3549
216	ZNF577	84765
217	GPR81	NA
218	ENO2	2026
219	RRN3P1	730092
220	PLAC1	10761
221	MOGAT3	346606
222	GZMA	3001
223	GPC2	221914
224	OCA2	4948
225	GAS2	2620
226	FBXO6	26270
227	ASCL2	430
228	TRIB2	28951
229	ABAT	18
230	MICB	4277
231	FAS	355
232	SOSTDC1	25928
233	PALM3	342979
234	C6orf15	29113
235	TNFSF9	8744
236	VNN2	8875
237	ACSL6	23305
238	SALL4	57167
239	DNAH2	146754
240	SLC19A3	80704
241	C2orf54	79919
242	SLC6A6	6533
243	TP53TG1	11257
244	PLA2R1	22925
245	UBE2L6	9246
246	CAPN3	825
247	MYEF2	50804
248	LOC654342	654342
249	PRF1	5551
250	APOL3	80833
251	UBASH3B	84959
252	ZC4H2	55906
253	CDHR1	92211
254	MSH4	4438
255	APLF	200558
256	DAPK1	1612
257	TG	7038
258	HSPA4L	22824
259	RARRES3	5920
260	SLC15A1	6564
261	TP73	7161
262	ETV7	51513
263	KDELR3	11015
264	ZNF543	125919
265	ZNF618	114991
266	ODF3B	440836
267	PMFBP1	83449
268	SLC23A1	9963
269	TRMT12	55039
270	CTXN1	404217
271	WARS	7453
272	NODAL	4838
273	AKAP3	10566
274	PIGZ	80235
275	NSUN5P2	260294
276	LOC148709	148709
277	IYD	389434
278	SERPINA7	6906
279	GBP2	2634
280	IRF1	3659
281	SLC13A2	9058
282	LOC100134229	NA
283	QPCT	25797
284	ARID3A	1820
285	IL15	3600
286	PNPLA3	80339
287	CC2D2A	57545
288	ITGB7	3695
289	RBP2	5948
290	RARRES1	5918
291	CLSPN	63967
292	SPATA18	132671
293	CYP4F2	8529
294	LOC728819	NA
295	MAPK11	5600
296	MYOM3	127294
297	C1orf180	NA
298	SLC1A1	6505
299	VENTX	27287
300	C8orf45	NA
301	AHSA2	NA
302	C11orf90	NA
303	KNG1	3827
304	RAB3A	5864
305	FABP6	2172
306	PMEPA1	56937
307	PRKACB	5567
308	CTSE	1510
309	VNN1	8876
310	DLX3	1747
311	ABCB1	5243
312	RGN	9104
313	APOL2	23780
314	PRAP1	118471
315	GBP1	2633
316	RXFP4	339403
317	REN	5972
318	ZNF439	90594
319	TYMP	1890
320	SLC13A3	64849
321	IGSF22	283284
322	FAM46A	55603
323	LRIT2	340745
324	KLF7	8609
325	MAPK12	6300
326	PTPRO	5800
327	TFCP2L1	29842
328	LOC441046	NA
329	N4BP3	23138
330	FAM115C	NA
331	DHDPSL	NA
332	XPNPEP2	7512
333	CD55	1604
334	ABCC6	368
335	KRTAP5-1	387264
336	LAG3	3902
337	SEMA3C	10512
338	HAS2AS	NA
339	MT1E	4493
340	GPR160	26996
341	UCKL1AS	NA
342	ELAVL2	1993
343	SLC26A3	1811
344	SPAG4	6676
345	CD274	29126
346	SAMD9L	219285
347	PCDH20	64881
348	PRDM16	63976
349	PBX1	5087
350	IFNG	3458
351	NKG7	4818
352	C1orf230	NA
353	LOC100272228	NA
354	HLA-DMA	3108
355	OSR2	116039
356	FOXD1	2297
357	CAMK2N2	94032
358	NR1I2	8856
359	FAM167A	83648
360	PIK3AP1	118788
361	TMEM170B	100113407
362	ZNF606	80095
363	FAM189A2	9413
364	PDZD3	79849
365	VANGL2	57216
366	C7orf13	129790
367	CD24	100133941
368	AOAH	313
369	CFTR	1080
370	TMEM63C	57156
371	TRNP1	388610
372	CXCL14	9547
373	KLHL3	26249
374	C11orf20	NA
375	HOXB4	3214
376	HSF4	3299
377	MUC6	4588
378	APCDD1	147495
379	FBXL16	146330
380	HCG11	493812
381	DSCR6	NA
382	ZNF141	7700
383	ZNF541	84215
384	ISM2	145501
385	TNFRSF18	8784
386	TMEM176B	28959
387	SLC1A7	6512
388	SERPINA10	51156
389	MIA2	4253
390	SLC38A3	10991
391	IFI30	10437
392	F10	2159
393	MUC20	200958
394	PM20D2	135293
395	APOLD1	81575
396	TTLL3	26140
397	KCND3	3752
398	NOX1	27035
399	FASLG	356
400	GJB5	2709
401	COL9A1	1297
402	CCL4	6351
403	ABCC6P1	653190
404	LDLRAD3	143458
405	MLPH	79083
406	ZNF285	26974
407	UGT1A8	54576
408	CADPS	8618
409	IGF2BP1	10642
410	ROBO3	64221
411	CXCL10	3627
412	GABRP	2568
413	NSUN5P1	155400
414	CELF5	60680
415	CXCL9	4283
416	C9orf125	NA
417	ANO1	55107
418	SRPX2	27286
419	GALNT5	11227
420	SLC2A12	154091
421	ABCC6P2	730013
422	RASL10B	91608
423	GPR120	NA
424	SAMD13	148418
425	SHROOM2	357
426	CKMT2	1160
427	SDR42E1	93517
428	GZMH	2999
429	TLE2	7089
430	EREG	2069
431	S100A14	57402
432	HOXC4	3221
433	C12orf27	NA
434	OGDHL	55753
435	PHYHIPL	84457
436	VIL1	7429
437	CD74	972
438	TH	7054
439	MAP7D2	256714
440	GLYATL1	92292
441	REEP1	65055
442	AS3MT	57412
443	SNPH	9751
444	ISG20	3669
445	BRSK2	9024
446	SLC3A1	6519
447	ATG9B	285973
448	PDE6A	5145
449	PLTP	5360
450	HAPLN3	145864
451	MTMR8	55613
452	PCDH19	57526
453	CYP2W1	54905
454	SCNN1B	6338
455	VMO1	284013
456	UGT2A3	79799
457	QSOX1	5768
458	XKR9	389668
459	SOX8	30812
460	CLDN3	1365
461	BCL11A	53335
462	CYP27A1	1593
463	CHP2	63928
464	TLR3	7098
465	CTSW	1521
466	KRT7	3855
467	MTNR1A	4543
468	ENPP5	59084
469	ALOX12B	242
470	MPP1	4354
471	GYG2	8908
472	DPEP1	1800
473	SLC26A2	1836
474	SELENBP1	8991
475	CCL5	6352
476	TMPRSS3	64699
477	C10orf47	NA
478	POU4F1	5457
479	AFAP1L2	84632
480	C1orf175	NA
481	OXGR1	27199
482	KLRD1	3824
483	C1orf59	NA
484	FAM26F	NA
485	B3GNT4	79369
486	HMGCS2	3158
487	GLT25D2	NA
488	ZNF385A	25946
489	HLA-DRA	3122
490	CBLN1	869
491	IL1RN	3557
492	CLDN9	9080
493	APOBEC3D	140564
494	LOC554202	NA
495	CRIP1	1396
496	TBX21	30009
497	RAP1GAP	5909
498	BBS5	129880
499	RHCG	51458
500	APOL4	80832
501	RHOF	54509
502	NFATC1	4772
503	LRRC19	64922
504	IL2RB	3560
505	LRP4	4038
506	SLC9A7	84679
507	LOC153328	NA
508	PRLR	5618
509	BCL2A1	597
510	FSCN1	6624
511	NOTUM	147111
512	DNAH1	25981
513	HAR1B	768097
514	WIF1	11197
515	LPO	4025
516	ARHGAP10	79658
517	CLDN15	24146
518	MIR17HG	407975
519	LY6E	4061
520	SAMD9	54809
521	OAS2	4939
522	C1orf88	NA
523	PTP4A3	11156
524	NXF3	56000
525	PCLO	27445
526	LILRA3	11026
527	CPN1	1369
528	NFASC	23114
529	KRT86	3892
530	MEP1A	4224
531	ADAMTSL2	9719
532	LOC149837	NA
533	NCKAP5	344148
534	PDE10A	10846
535	CCK	885
536	NKD2	85409
537	OTX1	5013
538	IFIT2	3433
539	APOL1	8542
540	TLE6	79816
541	GRAMD1B	57476
542	DDC	1644
543	IFIT3	3437
544	TMEM211	255349
545	ZNF345	25850
546	PLA2G2A	5320
547	LOC400759	NA
548	IL34	146433
549	FAM174B	400451
550	CA8	767
551	PGBD5	79605
552	SMTNL2	342527
553	NCF2	4688
554	DIO3OS	64150
555	B3GNT8	374907
556	TMPRSS13	84000
557	WNK4	65266
558	ZNF737	100129842
559	ZNF529	57711
560	ABCA3	21
561	EYA1	2138
562	KCNN2	3781
563	LUZP2	338645
564	TAS1R3	83756
565	METRN	79006
566	CLDN18	51208
567	CXCL13	10563
568	SEMG2	6407
569	ANXA10	11199
570	ETNK2	55224
571	SPDEF	25803
572	KYNU	8942
573	VWA5B1	127731
574	CNTN3	5067
575	NHLRC1	378884
576	SERPINA6	866
577	GBP5	115362
578	EPHA4	2043
579	LARP6	55323
580	KCTD12	115207
581	CD7	924
582	PIPOX	51268
583	CHST6	4166
584	HLA-DRB1	3123
585	GAD1	2571
586	BIRC3	330
587	PCP4	5121
588	MYH7B	57644
589	FOLR1	2348
590	CMPK2	129607
591	ALOX15B	247
592	DNAH14	127602
593	IRX2	153572
594	SATB1	6304
595	PPP1R14C	81706
596	PTPRU	10076
597	ADRB1	153
598	NINL	22981
599	SLC7A11	23657
600	AIF1L	83543
601	FAM155B	27112
602	HAVCR1	26762
603	MTERF	NA
604	PTGER2	5732
605	SPINK1	6690
606	FADS6	283985
607	SCN5A	6331
608	KLHDC7B	113730
609	CPLX2	10814
610	MAMLD1	10046
611	ID4	3400
612	SHISA9	729993
613	HOXC5	3222
614	PAX9	5083
615	GUCY2C	2984
616	HOXD1	3231
617	KLRK1	22914
618	FCGR3A	2214
619	CLEC5A	23601
620	C1orf130	NA
621	GGH	8836
622	FAM150A	NA
623	PLCL2	23228
624	SYCP2	10388
625	REG1A	5967
626	KCNMB4	27345
627	LCK	3932
628	CCL8	6355
629	ZNF423	23090
630	RBP3	5949
631	OSR1	130497
632	BAHCC1	57597
633	C5orf38	153571
634	HLA-DMB	3109
635	COL2A1	1280
636	LPHN3	NA
637	LRRC31	79782
638	C21orf56	NA
639	KRT20	54474
640	APOBEC3G	60489
641	TBX10	347853
642	CD109	135228
643	PCSK9	255738
644	DIO3	1735
645	MUC2	4583
646	SERPINB5	5268
647	CXCR4	7852
648	GPX2	2877
649	FPR2	2358
650	NRXN2	9379
651	GRIN1	2902
652	TMEM61	199964
653	KCNJ3	3760
654	SEMG1	6406
655	UNC5A	90249
656	MPV17L	255027
657	HULC	728655
658	PTAFR	5724
659	ID1	3397
660	TFF2	7032
661	CEACAM5	1048
662	HAVCR2	84868
663	ESRRG	2104
664	PLA2G4F	255189
665	ATP10B	23120
666	CCL4L2	9560
667	ST6GALNAC2	10610
668	TNMD	64102
669	MCTP1	79772
670	SLC4A11	83959
671	SERPINB2	5055
672	LYZ	4069
673	CDX2	1045
674	CKB	1152
675	FHOD3	80206
676	TCN1	6947
677	TNFRSF11A	8792
678	HLA-DPA1	3113
679	WNT7B	7477
680	EN2	2020
681	FAM177B	400823
682	COCH	1690
683	SLC4A8	9498
684	HAR1A	768096
685	ZNF853	54753
686	TMEM35	NA
687	MMP12	4321
688	SCN8A	6334
689	RASSF10	644943
690	SLAMF8	56833
691	ABCC2	1244
692	LOC84740	NA
693	CNGA1	1259
694	PLEKHH2	130271
695	FRMD1	79981
696	SHF	90525
697	C1QA	712
698	TIAM1	7074
699	AREG	374
700	RBP1	5947
701	BST2	684
702	MUC1	4582
703	ISX	91464
704	IDO1	3620
705	TRIM72	493829
706	LOC100190940	NA
707	C1QB	713
708	AGT	183
709	CXCL11	6373
710	LRRN1	57633
711	TOX	9760
712	PLAGL1	5325
713	C6orf97	NA
714	SLC43A3	29015
715	HLA-DPB1	3115
716	UGT1A10	54575
717	FGFR4	2264
718	PLAG1	5324
719	PLA2G3	50487
720	SPHK1	8877
721	EVX1	2128
722	MYRIP	25924
723	ARNT2	9915
724	KIAA0802	NA
725	HSD17B2	3294
726	ASRGL1	80150
727	FUZ	80199
728	NXPH4	11247
729	FREM1	158326
730	C3orf67	200844
731	NPY1R	4886
732	MFAP3L	9848
733	ROBO2	6092
734	MLXIPL	51085
735	CAPN13	92291
736	SYT1	6857
737	LILRB2	10288
738	CNTD2	79935
739	RAB26	25837
740	STRA6	64220
741	PTGS2	5743
742	AGR3	155465
743	BARX2	8538
744	GJB1	2705
745	CD8A	925
746	CPA6	57094
747	ZNF488	118738
748	CPE	1363
749	BEX2	84707
750	TRHDE	29953
751	INSM1	3642
752	C12orf36	NA
753	DACH1	1602
754	PLEK	5341
755	TLR8	51311
756	RBM11	54033
757	AQP5	362
758	ZIC5	85416
759	VWA2	340706
760	DPYD	1806
761	WSCD1	23302
762	PID1	55022
763	HK3	3101
764	PCSK1N	27344
765	LPL	4023
766	GUCA2A	2980
767	SRPK3	26576
768	GPR115	NA
769	CLEC4E	26253
770	IRX3	79191
771	CAMKV	79012
772	TSPAN7	7102
773	ISL1	3670
774	DOC2B	8447
775	ZNF43	7594
776	HOXD10	3236
777	NCF1	653361
778	CALML3	810
779	TNFSF13B	10673
780	IL1R2	7850
781	LIN7A	8825
782	CRABP1	1381
783	SYTL5	94122
784	DAPP1	27071
785	C1QC	714
786	CITED1	4435
787	C17orf73	NA
788	SLC4A4	8671
789	VWDE	221806
790	GRIP2	80852
791	AQP12B	653437
792	HLA-DRB5	3127
793	C2CD4A	145741
794	SULT1B1	27284
795	PSAPL1	768239
796	FAM23A	NA
797	LRRC26	389816
798	CFD	1675
799	SERPINA3	12
800	MARK1	4139
801	TM4SF4	7104
802	NAT2	10
803	TREM1	54210
804	TTPA	7274
805	PDE3A	5139
806	ACOX2	8309
807	ADH4	127
808	OSTBETA	NA
809	ANK1	286
810	GCNT3	9245
811	ZNF518B	85460
812	MLF1	4291
813	ZNF662	389114
814	TRIM40	135644
815	CCRL1	NA
816	ZMAT1	84460
817	HYAL1	3373
818	ACPP	55
819	PDCD1LG2	80380
820	ITGB2	3689
821	SLC17A4	10050
822	FAM189A1	23359
823	ITGA9	3680
824	AGAP2	116986
825	ROR1	4919
826	VSIG4	11326
827	NRXN3	9369
828	PDGFRL	5157
829	TMEM151A	256472
830	STMN2	11075
831	FIBCD1	84929
832	S100A8	6279
833	UBD	10537
834	LEFTY1	10637
835	IPW	3653
836	KIT	3815
837	VSTM2L	128434
838	FCGR3B	2215
839	TNFSF11	8600
840	DPCR1	NA
841	C8G	733
842	ADAM28	10863
843	CES1	1066
844	CCL26	10344
845	EMX1	2016
846	MEIS2	4212
847	ZIC2	7546
848	MARCO	8685
849	PRKAR2B	5577
850	FFAR2	2867
851	IFI6	2537
852	CPNE7	27132
853	GP2	2813
854	SERP2	387923
855	MCOLN2	255231
856	TMEM195	NA
857	SLC9A3	6550
858	ABCA12	26154
859	FGFR2	2263
860	MX1	4599
861	MMP1	4312
862	PIWIL1	9271
863	SEMA3A	10371
864	SNCAIP	9627
865	NEUROG3	50674
866	LILRB4	11006
867	SYT8	90019
868	WASF3	10810
869	SLC14A1	6563
870	FPR1	2357
871	HOXD11	3237
872	SLC1A3	6507
873	B3GNT7	93010
874	SERPINB7	8710
875	PDZK1	5174
876	LOC145837	NA
877	DTNA	1837
878	ABHD12B	145447
879	SERPINA1	5265
880	ZNF114	163071
881	HTR1D	3352
882	HLA-DQB1	3119
883	ZBTB7C	201501
884	C19orf77	NA
885	PLAC8	51316
886	HABP2	3026
887	IL8	NA
888	C3orf32	NA
889	SCML4	256380
890	MAT1A	4143
891	C11orf41	NA
892	DEFB1	1672
893	FLNC	2318
894	ALDH1L1	10840
895	ADAMTS15	170689
896	FBXW10	10517
897	ZMYND8	23613
898	KCNRG	283518
899	MOCS3	27304
900	DHRS12	79758
901	ELOVL3	83401
902	TTC30A	92104
903	LPCAT1	79888
904	SH2D1B	117157
905	LOC100128822	NA
906	NCRNA00182	NA
907	FMO4	2329
908	ZNRF3	84133
909	PTCH1	5727
910	CDRT1	374286
911	CDCA2	157313
912	GPR153	387509
913	C12orf57	113246
914	FUT8	2530
915	MACC1	346389
916	SLC22A3	6581
917	PBK	55872
918	ZNF503	84858
919	GPR3	2827
920	HSD17B1	3292
921	NRGN	4900
922	CDR2L	30850
923	DAB2	1601
924	PAK6	56924
925	ABLIM2	84448
926	CYP39A1	51302
927	CRYBA2	1412
928	ZC3H12B	340554
929	FCGRT	2217
930	CD164L2	388611
931	TSPYL3	NA
932	APC2	10297
933	C20orf134	NA
934	VWA3B	200403
935	RASGRP1	10125
936	LRRC37A3	374819
937	ANKRD43	NA
938	HSD11B2	3291
939	FAM127B	NA
940	CEACAM3	1084
941	ZFP3	124961
942	TGFBI	7045
943	CD244	51744
944	ZFP28	140612
945	AUTS2	26053
946	C19orf38	255809
947	GLOD5	392465
948	CRB2	286204
949	LRRC43	254050
950	C20orf151	NA
951	ANG	283
952	SYT12	91683
953	ANXA9	8416
954	ZNF137	NA
955	PNPLA1	285848
956	MT1X	4501
957	IL18RAP	8807
958	MTMR11	10903
959	LOC283070	NA
960	PBLD	64081
961	RSPH1	89765
962	CAMK1D	57118
963	ZNF570	148268
964	TRERF1	55809
965	SERPINE2	5270
966	TLL2	7093
967	PDCD1	5133
968	CRTAM	56253
969	SPACA3	124912
970	PARK2	NA
971	C2CD4C	126567
972	C1orf161	NA
973	HOXC10	3226
974	C19orf45	NA
975	HOXA2	3199
976	LOC728875	NA
977	NBPF7	343505
978	HOXA3	3200
979	CACNA1D	776
980	TIGIT	201633
981	HCST	10870
982	C10orf11	NA
983	SLA2	84174
984	SRCIN1	80725
985	CATSPERB	79820
986	THNSL2	55258
987	JAKMIP1	152789
988	CHFR	55743
989	FBXO16	157574
990	AZGP1	563
991	ZNF550	162972
992	KRT13	3860
993	WNT5B	81029
994	SIRPG	55423
995	TNFAIP2	7127
996	RHOV	171177
997	RCOR2	283248
998	ZNF790	388536
999	CD247	919
1000	ZBED2	79413
1001	HOXC9	3225
1002	ZNF610	162963
1003	CCL3	6348
1004	FAM46C	54855
1005	XAF1	54739
1006	BMP5	653
1007	COL9A3	1299
1008	ARX	170302
1009	EMID1	129080
1010	CELSR3	1951
1011	C2orf89	NA
1012	CD96	10225
1013	C5orf4	NA
1014	PHGR1	644844
1015	HOXC8	3224
1016	CDH17	1015
1017	CXCR6	10663
1018	BAG2	9532
1019	CD3D	915
1020	FGGY	55277
1021	CYP4F3	4051
1022	CD2	914
1023	ESPN	83715
1024	HHIP	64399
1025	CD300LF	146722
1026	HTR4	3360
1027	CH25H	9023
1028	CEACAM6	4680
1029	D4S234E	NA
1030	EOMES	8320
1031	THRB	7068
1032	OASL	8638
1033	SLC16A9	220963
1034	NPSR1	387129
1035	C14orf115	NA
1036	L3MBTL4	91133
1037	EGLN3	112399
1038	FGF13	2258
1039	IL21R	50615
1040	FAM55D	NA
1041	SLC2A5	6518
1042	TMSB15B	286527
1043	PLCB1	23236
1044	IQGAP2	10788
1045	ST6GAL1	6480
1046	NDUFA4L2	56901
1047	ONECUT2	9480
1048	ARSJ	79642
1049	CD86	942
1050	ZNF595	152687
1051	SYTL1	84958
1052	IL2RA	3559
1053	HAGHL	84264
1054	MUC5B	727897
1055	PNMA2	10687
1056	SPERT	220082
1057	ZSCAN18	65982
1058	MRAP2	112609
1059	CCL18	6362
1060	TMEM150B	284417
1061	NEU4	129807
1062	LILRB3	11025
1063	LILRA6	79168
1064	PROX1	5629
1065	GLRA2	2742
1066	FCGR1A	2209
1067	SERPIND1	3053
1068	PKP1	5317
1069	SLC11A1	6556
1070	NFATC2	4773
1071	EDAR	10913
1072	TAC1	6863
1073	LOC389332	NA
1074	DUSP15	128853
1075	FGF19	9965
1076	HLA-DOA	3111
1077	SLC7A4	6545
1078	SNURF	8926
1079	TRIM54	57159
1080	MYADML2	255275
1081	RNF182	221687
1082	ELN	2006
1083	KRT16	3868
1084	FRZB	2487
1085	ST6GAL2	84620
1086	UCA1	652995
1087	CLGN	1047
1088	PTPRR	5801
1089	F2RL2	2151
1090	HOXB9	3219
1091	AIM2	9447
1092	CALCA	796
1093	PNLIPRP2	5408
1094	LOC723809	NA
1095	GREM2	64388
1096	SPRR1B	6699
1097	UGT1A1	54658
1098	KLK11	11012
1099	KCNG1	3755
1100	DPP10	57628
1101	HLA-DQA1	3117
1102	MS4A12	54860
1103	COL4A5	1287
1104	HCN1	348980
1105	MUC4	4585
1106	CD163	9332
1107	DDO	8528
1108	FER1L6	654463
1109	CAPN6	827
1110	GPR110	NA
1111	NOS2	4843
1112	CHRM1	1128
1113	ZNF681	148213
1114	UGT1A6	54578
1115	DNAJC6	9829
1116	IGFL2	147920
1117	DMKN	93099
1118	SPAG16	79582
1119	ODAM	54959
1120	PRSS21	10942
1121	HOXC11	3227
1122	CDHR2	54825
1123	CTNNA2	1496
1124	TNFRSF19	55504
1125	ATP1A3	478
1126	COL17A1	1308
1127	SLC28A3	64078
1128	SULT2A1	6822
1129	DPP4	1803
1130	GZMK	3003
1131	PI3	5266
1132	AQP8	343
1133	NANOS3	342977
1134	LGR6	59352
1135	SOX1	6656
1136	FOXP2	93986
1137	IL1B	3553
1138	PRKCG	5582
1139	CIDEC	63924
1140	HEPHL1	341208
1141	CCL13	6357
1142	NXPH3	11248
1143	SPRR3	6707
1144	KRT75	9119
1145	KRT40	125115
1146	HHLA2	11148
1147	UPK3A	7380
1148	SAA2	6289
1149	CP	1356
1150	AQP9	366
1151	APOE	348
1152	LOC146336	NA
1153	BMP3	651
1154	FRAS1	80144
1155	GPR109B	NA
1156	ALPPL2	251
1157	KLK10	5655
1158	MT1M	4499
1159	ALPK3	57538
1160	TFF1	7031
1161	NPTX2	4885
1162	SLC6A14	11254
1163	LTK	4058
1164	CWH43	80157
1165	MSI1	4440
1166	PSCA	8000
1167	GPR109A	NA
1168	CHST5	23563
1169	PPP2R2C	5522
1170	SCARA5	286133
1171	LGR5	8549
1172	HBA1	3039
1173	CHST4	10164
1174	SPP1	6696
1175	PLA2G2D	26279
1176	L1CAM	3897
1177	LY6D	8581
1178	PRSS33	260429
1179	CA2	760
1180	FCGBP	8857
1181	PRKAA2	5563
1182	C19orf46	NA
1183	REG1B	5968
1184	DEFA6	1671
1185	SYNM	23336
1186	TRIM58	25893
1187	APOD	347
1188	CA9	768
1189	IGF2BP3	10643
1190	C20orf56	NA
1191	HSPB6	126393
1192	DEFA5	1670
1193	CPS1	1373
1194	ATOH1	474
1195	HS6ST2	90161
1196	EGF	1950
1197	LOC646627	NA
1198	SPINK4	27290
1199	ADH1C	126
1200	LCN15	389812
1201	SCEL	8796
1202	FAM3B	54097
